# Supplementary material for: Nocturnal Blood Pressure Is Reduced by a Mandibular Advancement Device for Sleep Apnea in Women: Findings From Secondary Analyses of a Randomized Trial
Source: PubMed Central journal article supplement — J Am Heart Assoc. 2018 Jun 21;7(13):e008642. doi: 10.1161/JAHA.118.008642 (PMC6064893; doi:10.1161/jaha.118.008642), 2018-06-21
Supplement: JAH3-7-e008642-s001.pdf [file JAH3-7-e008642-s001.pdf]

# **SUPPLEMENTAL MATERIAL**

**Table S1. Effects of the mandibular advancement device on sleep quality in the whole sample.**

|                  | MAD (n=42)   |              | Sham (n=43)  |              | Crude difference       | Adjusted† difference   |
|------------------|--------------|--------------|--------------|--------------|------------------------|------------------------|
|                  | Mean (SD)    |              | Mean (SD)    |              | Mean (95% CI)          | Mean (95% CI)          |
|                  | Baseline     | Four months  | Baseline     | Four months  | Sham-MAD               | Adjusted† Sham-MAD     |
| Sleep efficiency | 90.6 (8.3)   | 91.3 (8.8)   | 91.6 (5.8)   | 91.7 (6.5)   | 0.4<br>(-3.0 to 3.7)   | 0.7<br>(-2.2 to 3.5)   |
| Total sleep time | 410.3 (44.2) | 400.7 (57.9) | 436.2 (64.3) | 430.1 (59.3) | 29.4*<br>(4.1 to 54.7) | 19.9<br>(-5.1 to 44.9) |
| Stage 1          | 11.5 (6.5)   | 10.5 (5.3)   | 11.9 (7.0)   | 13.7 (11.2)  | 3.2<br>(-0.6 to 6.9)   | 2.7<br>(-0.5 to 5.9)   |
| Stage 2          | 53.5 (8.8)   | 50.3 (7.2)*  | 52.4 (10.5)  | 49.2 (10.6)* | -1.2<br>(-5.1 to 2.7)  | -1.2<br>(-4.6 to 2.2)  |
| Stage 3-4        | 15.4 (7.0)   | 16.9 (7.1)   | 14.9 (7.9)   | 15.9 (7.8)   | -0.9<br>(-4.1 to 2.3)  | -0.4<br>(-2.9 to 2.2)  |
| REM              | 19.9 (5.6)   | 22.1 (5.8)*  | 20.9 (5.6)   | 21.2 (7.6)   | -0.9<br>(-3.8 to 2.1)  | -0.8<br>(-3.5 to 1.8)  |

MAD = mandibular advancement device †Adjusted for baseline value, apnea-hypopnea index, age, sex and body mass index

\*P<0.05, \*\* P<0.01, \*\*\* P<0.001

**Figure S1. Systolic (SBP) and diastolic (DBP) blood pressure at baseline and at follow-up after four months of using a mandibular advancement device or a sham device in the whole study sample.**

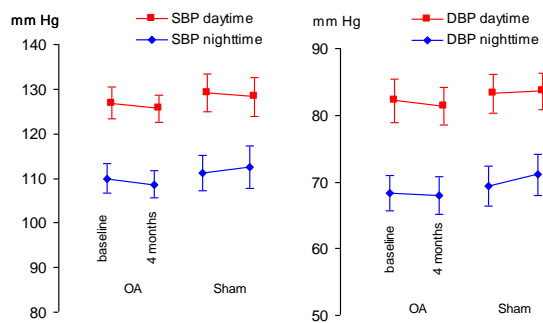

Values are expressed as the mean and 95% confidence interval.
